# Supplementary material for: Relative differential equations from water treatment Leukocytes with self-operating computer
Source: Research Square preprint supplement (doi:10.21203/rs.3.rs-446592/v1), 2021-04-22
Supplement: Supplementary file 1 [file 0003b39d407f2a9b81071127.docx]

**Supplementary Materials**

**Supplementary S1 equations C5 to C7**

**C5**

**C6**

C6 is anti-time (AT) and/or anti-matter (AM) from C3 is, (the C6 has which at least one term.)

**C7**

C7 is anti-time (AT) and/or anti-matter (AM) from C4 is, (the C7 has which at least one term.)

**Supplementary S2 operators**

Conventional absolute-value operator (AVO) is,

Relative absolute value operator (RAO) is,

**Supplementary S3 Quadrature by parts (QBP) and definite integration,**

**Quadrature by parts (QBP) with an interval and definite integrations,**

The width of each (rectangles) is Δ*N*.

Nj*=* Na+jΔ*N*, and the area of each rectangle is　*f*(Nj)Δ*N*.

Lower side is,

Upper side is,

In interval [Na, Nb] and *f*(N), the area by definite integration is,

Therefore,

And, Str operator is added, (example of b=2, a=1) (cd: convergence differential operator)

**1/N by quadrature by parts (QBP) with an interval and indefinite integration,**

, It determines the area byN1, N2, and *f(*N*)* by quadrature by parts (QBP) for interval.

…

The rectangle area from N1 to N2 is

Therefore,

Here,

Result,

Therefore, the solution of indefinite integration is,

**Supplementary S4 variable separation**
